1

2

3 **Carbon metabolism, transcriptome and RNA editome in developmental**  
4 **paths differentiation of *Coprinopsis cinerea***

5

6 Yichun Xie,<sup>a</sup> Jinhui Chang,<sup>a</sup> Hoi Shan Kwan<sup>a#</sup>

7

8 Running head: *C. cinerea* developmental paths differentiation

9

10 <sup>a</sup>School of Life Sciences, The Chinese University of Hong Kong, Shatin, New Territories,  
11 Hong Kong SAR, China

12

13 #Address correspondence to Hoi Shan Kwan, [hoishankwan@cuhk.edu.hk](mailto:hoishankwan@cuhk.edu.hk).

14

15 **Abstract**

16 The balance and interplay between sexual and asexual reproduction is one of the most  
17 attractive mysteries in fungi. The choice of developmental strategy reflects the ability of  
18 fungi to adapt to the changing environment. However, the evolution of developmental paths  
19 and the metabolic regulation during differentiation and morphogenesis are poorly understood.  
20 Here, we monitor the carbohydrate metabolism and gene expression regulation during the  
21 early differentiation process from the “fungal stem cell”, vegetative mycelium, to the highly  
22 differentiated tissue/cells, fruiting body, oidia or sclerotia, of a homokaryotic fruiting  
23 *Coprinopsis cinerea* strain A43mut B43mut pab1-1 #326, uncovering the systematic changes  
24 during morphogenesis and the evolutionary process of developmental strategies. Conversion  
25 between glucose and glycogen and conversion between glucose and beta-glucan are the main  
26 carbon flows in the differentiation processes. Genes related to carbohydrate transport and  
27 metabolism are significantly differentially expressed among paths. RNA editing, a novel  
28 layer of gene expression regulation, occurs in all four developmental paths and enriched in  
29 cytoskeleton and carbohydrate metabolic genes. It is developmentally regulated and  
30 evolutionarily conserved in basidiomycetes. Evolutionary transcriptomic analysis on four  
31 developmental paths showed that all transcriptomes are under purifying selection, and the  
32 more stressful the environment, the younger the transcriptome age. Oidiation has the lowest  
33 value of transcriptome age index (TAI) and transcriptome divergence index (TDI), while  
34 fruiting process has the highest of both indexes. These findings provide new insight to the  
35 regulations of carbon metabolism and gene expressions during fungal developmental paths  
36 differentiation.

38 **Importance**

39 Fungi is a group of species with high diversity and plays essential roles to the ecosystem. The  
40 life cycle of fungi is complex in structure and delicate in function. Choice of developmental  
41 strategies and internal changes within the organism are both important for the fungus to fulfill  
42 their ecological functions, reflecting the relationship between environment and the  
43 population. This study put the developmental process of vegetative growth, sexual and  
44 asexual reproduction, resistant structure formation of a classical model basidiomycetes  
45 fungus, *C. cinerea*, together for the first time to view the developmental paths differentiation  
46 process with physiology, transcriptomics and evolutionary prospects. Carbohydrate assays  
47 and RNA-seq showed the changes of the fungus. Our results fill the gaps on gene expression  
48 regulation during the early stage of developmental paths differentiation, and expand our  
49 understanding of the evolutionary process of life history and reproductive strategy in fungi.

50 **Keywords**

51 Developmental paths, carbon metabolic flux, transcriptome, RNA editing,  
52 phylotranscriptomic

53

## 54 **Introduction**

55 The life cycle of fungi is one of the most delicate and mysterious development blueprints in  
56 the living world. Basidiomycetes, a group of advanced fungi, could diverge themselves into  
57 different developmental paths under specific environment (1–3). Triggering by the changes of  
58 environmental and internal physiological conditions, organism undergoes particular path and  
59 reaches the developmental destiny of forming asexual spores (oidia), sexual spores (basidia),  
60 monocellular or multicellular resting structures (chlamydo spores and sclerotia) (4–7).

61 *Coprinopsis cinerea* is a model basidiomycete fungus which has multiple developmental  
62 paths and has well annotated genome of strain Okayama-7 #130 and strain A43mut B43mut  
63 *pab1-1* #326 released (8, 9). *C. cinerea* can form several types of specialized reproductive  
64 structures to disperse and survive, according to the environmental conditions. Beginning from  
65 vegetative mycelium, the fungus goes along the developmental path of fruiting, oidiation or  
66 sclerotia formation (Fig. 1). During the differentiation process, several developmental  
67 changes occur in the organism, including regulations on gene expression, redistribution of  
68 chemicals, and specification on morphology (10–12). Fruiting body is a highly differentiated  
69 multicellular structure which forms during the sexual reproductive process (9). When the  
70 fungus is under nutrient depletion and exposing to low temperature and light-dark cycle,  
71 vegetative mycelium would undergo sexual reproduction. Hyphal knots develop from the  
72 aggregation of hyphae, they differentiate into fruiting body primordium, and finally become  
73 the mature fruiting body. During the maturation, basidiospores are produced by basidia in the  
74 cap and released as the cap autolyze. Oidia are asexual spores that form in favorable  
75 environment with light. *C. cinerea* can produce tremendous amount of oidia in a day.

76 However, oidia are short-lived and fragile in stressful environment (13). Sclerotia are  
77 persistent resting structures that developed under continuous dark (14). They are multicellular  
78 structures in round shape, with internal medulla tissue and external rind tissue (15). The  
79 whole sclerotia are pigmented and in brown color (16).

80 In fungi, carbon metabolism is important to the differentiation process and complex  
81 morphogenesis. The transition from vegetative mycelia to each developmental destiny  
82 requires the core role of carbohydrate metabolism (17). Carbon metabolic flux describes the  
83 turn-over rate of molecules in carbon metabolic pathways. Such flux is regulated by enzymes  
84 and metabolic flux analysis (MFA) is important for metabolic adaptation studies (18–20).

85 Through the carbon metabolic flux, materials and energy exchange between the organism and  
86 the environment, and they transfer within the organism and converse into different forms.

87 Moreover, the construction of complex multicellular structure requires the conversion among  
88 different forms of carbohydrates (17, 21, 22). In the vegetative growth stage, mycelia intake

89 simple sugar and synthesize glycogen (23–25). During the fruiting bodies or sclerotia

90 formation, glycogen is transported from mycelium to newly-formed structures. It is broken

91 down into glucose, and depleted along the maturation (25, 26). Beta-glucan is reserved in

92 aging multicellular structures, such as fruiting bodies and sclerotia (5, 27, 28). Enzymes

93 involved in fungal cell wall remodeling are up-regulated during the fruiting process (29–31).

94 Despite carbohydrate metabolism has essential roles on differentiation and morphogenesis,

95 how the transition is induced remains unclear.

96 RNA editing is regarded as a novel layer in gene expression regulation of fruiting body

97 development (32). It is a kind of co-/post-transcriptional modification on RNA sequence,

98 which can rewrite the genetic information in DNA at RNA level (33). By recoding the RNA  
99 sequence, RNA editing gives higher flexibility and more probability to transcriptome and  
100 proteome (34). Recently, several studies have been done in fungi, focusing on stage-specific  
101 and substrate-specific RNA editing events. Three ascomycetes, *Fusarium graminearum*,  
102 *Neurospora crassa* and *Neurospora tetrasperma*, have conserved stage-specific A-to-I RNA  
103 editing events during sexual reproduction (35). Developers of FairBase summarized the A-to-  
104 I RNA editing events in fungi, and emphasized that all these events are stage-specific and  
105 related to sexual reproduction (36). However, all 6 species included in FairBase are  
106 ascomycetes, and the A-to-I RNA editing preference in reported basidiomycetes are weak.  
107 Among the basidiomycetes, *Ganoderma lucidum* has stage-specific RNA editing events  
108 during fruiting body formation and 5 brown rot wood-decay fungi have substrate-specific  
109 RNA editing events (37, 38). These 6 species possess all types of RNA editing and with site  
110 densities much lower than those ascomycetes case studies.

111 The four developmental paths, namely vegetative growth, fruiting, oidiation and sclerotia  
112 formation, make *C. cinerea* able to adapt to divergent environment. Although the fruiting  
113 process have been studied and well described with transcriptomic and proteomic methods,  
114 our knowledge on oidia and sclerotia formation remains on single gene level (9, 39–42). The  
115 strain #326 used in this study is a homokaryotic strain with mutations in both mating type  
116 factor A and B (43). It shows the special feature of clamp formation and fruiting without  
117 mating, and possesses the ability of oidia and sclerotia formation, which gives us a chance to  
118 investigate developmental paths differentiation in *C. cinerea* with a clear genetic background.  
119 For the first time, we i) described carbon metabolic flux of four developmental paths; ii)

120 figured out carbohydrate metabolism and energy production and conversion genes that are  
121 intensively regulated during morphogenesis; iii) clarified the evolutionary features of  
122 transcriptome profiles and explained the origin of developmental paths and adaptation to the  
123 environment; iv) uncovered the RNA editome in developmental paths differentiation. Our  
124 results enable us to have better understanding on the origin and regulation of developmental  
125 paths differentiation in advanced fungi.

## 126 **Results**

### 127 **Temperature and light affect the divergence of developmental paths**

128 To investigate the effect of environmental conditions on diverging the developmental paths,  
129 *C. cinerea* A43mut B43mut pab1-1 #326 cultures were treated with different combinations of  
130 temperature and light (Fig. 1). A 5 mm diameter mycelial punch was inoculated to each  
131 cellophane covered YMG agar plate (0.4% yeast extract, 1% malt extract, 0.4% glucose and  
132 1.5% agar, 36 g medium per 90 mm diameter petri dish). The 5.5 days incubation in 37 °C  
133 with continuous dark allowed fully growth of vegetative mycelium. Fruiting body initials and  
134 mature fruiting bodies were seen on cultures after exposing to three and eight 12 h:12 h light-  
135 dark cycles in 28 °C, respectively. Oidia formation was highly induced under continuous light  
136 compared to continuous dark in 37 °C ( $P < 0.001$ ,  $N = 6$ , Fig. S1a), with approx.  $10^9$  oidia per  
137 plate on day 5.5. Mycelial growth rate had no significant difference between two conditions  
138 ( $P > 0.05$ , Fig. S1b). Sclerotia were firstly observed on day 14, after the undisturbed  
139 incubation in 37 °C with continuous dark. On day 21,  $4.37 \pm 0.69 \times 10^4$  sclerotia were found  
140 per plate.

## 141 **Carbon metabolic flux differs among developmental paths**

142 To evaluate the carbon metabolic flux in *C. cinerea*, cultures of four developmental paths  
143 were sampled on two time points, developing colonies (marked as a) or developed colonies  
144 (marked as b), with 5 biological replicates (Fig. 1). Neither hyphal knot nor sclerotia can be  
145 found on the developing colonies (time point a). Each sugar content was determined using  
146 chemical assays and measured by dry weight. Different types of carbohydrate were  
147 accumulated along the developmental paths (Fig. 2 and Table S1). During the vegetative  
148 growth process, glycogen was strongly accumulated to approx. 400 mg/g (dry weight, same  
149 below) in the hyphae and broken down when the colony was matured and shifted to the  
150 reproductive growth, reflecting the storage function of glycogen in fungal development. For  
151 vegetative mycelium, glucose content increased as colony grown and reached the peak of  
152  $266.16 \pm 33.34$  mg/g in fully grown mycelium. Mature colonies contain 1.5 times more beta-  
153 glucan than the growing ones. On the contrary, during oidiation, glucose content remains  
154 relatively constant at below 200 mg/g. Beta-glucan content was 100 ~ 150 mg/g less in oidia  
155 than vegetative mycelium. Moreover, the amount of total sugar was also less in oidia-forming  
156 colonies (60-70 % of dry weight) than vegetative growth colonies (75-85 % of dry weight),  
157 suggesting that more non-sugar compounds, such as proteins and lipids, are produced during  
158 oidiation. Sugars, proteins and lipids that are synthesized in hyphae could be transferred and  
159 stored in oidia, preparing for the rapid germination in the surrounding favorable sediment.

160 As nutrients in the sediment deplete, the colony turns to develop sexual reproductive  
161 structures or persistent resting structures according to the temperature and illumination. Being  
162 induced by low temperature and 12 h:12 h light-dark cycle, colonies with fully grown



163 mycelia entered the sexual reproductive path and formed hyphal knots. During the transition,  
164 glucose content dropped down while glycogen content slightly increased. Beta-glucan took  
165 up more than one third of dry weight in the fruiting colony. When the colony is trapped in  
166 high temperature and dark environment, sclerotia are developed as persistent resting  
167 structure. Compare to vegetative mycelium, contents of monosaccharide, disaccharide and  
168 glycogen continuously dropped down in sclerotia, beta-glucan accumulated and took up over  
169 50 % of the dry weight. In sclerotia, beta-glucan not only function as structuring constituent,  
170 but also the main type for carbon storage.

#### 171 **Transcriptome analysis on developmental paths differentiation**

172 To figure out the black box behind the carbon metabolic flux in developmental paths  
173 differentiation, we studied the transcriptome of oidia and sclerotia formation process in *C.*  
174 *cinerea* for the first time, together with the fruiting process. Samples of developing colonies  
175 (time point a) were selected for RNA extraction, and RNA-seq was performed in biological  
176 triplicates. Sample and data quality were listed in supplementary method (text S1). Pearson's  
177 correlation  $r^2$  value for replicates were between 0.9615 to 0.9883 (Fig. 3a), and Spearman's  
178 correlation  $\rho^2$  value were range from 0.9661 to 0.9841 (Fig. 3b). Among these developmental  
179 paths, oidia showed the highest similarity to mycelium, and other paths were strongly  
180 different from each other.

181 In this study, 10082 genes were detected to have expression in at least one developmental  
182 path, all of them can be matched with gene ID from strain Okayama-7 for further analysis (8,  
183 9). Taking gene expression levels in vegetative mycelium as references, 3962 differentially  
184 expressed genes (DEGs) were detected in other three paths and assigned to 6 groups (3 paths

185 with up-/down-regulation). Hyphal knot and sclerotia possessed larger amount of DEGs, with  
186 1142 and 2065 up-regulated genes and 1011 and 1009 down-regulated genes, respectively  
187 (Fig. 3c). In oidia, only 175 genes were up-regulated, while 460 genes were down-regulated.  
188 76 up-regulated and 171 down-regulated genes were shared by other three paths (Fig. 3d).  
189 Most DEGs displayed the fold change within 1/30 to 30 (Fig. 3e).

### 190 **Metabolic-related genes are differentially expressed in different developmental paths**

191 To have a closer look on the transition of expression profiles in the developmental process,  
192 we performed Gene ortholog (GO) term and EuKaryotic Orthologous Groups (KOG) term  
193 enrich analysis according to the DEG groups. KOG enrichment profile showed a strong shift  
194 of gene set usage during the development of hyphal knot and sclerotia, while little regulations  
195 were performed during oidia formation (Fig. 4). Similar to the result of KOG enrichment, GO  
196 enrichment analysis present significant turn over on gene expression in hyphal knot (Fig.  
197 S2a). During hyphal knot formation, genes related to “biological processes” and “cellular  
198 component” were being down-regulated globally. Along the oidiation process, small number  
199 of DEGs were called and the functional enrichment was weak. These results show the high  
200 similarity on expression profiles of vegetative growth and oidiation. In sclerotia, down-  
201 regulated genes were enriched in molecular function group, indicating the lower metabolic  
202 rate at the sclerotia forming stage.

203 Functional analysis based on KOG terms reveals that down-regulated genes in both hyphal  
204 knot and sclerotia paths were enriched on energy production and conversion function. In  
205 sclerotia, genes with function of cell wall/membrane/envelope biogenesis, carbohydrate  
206 transport and metabolism and amino acid transport and metabolism were significantly up-

207 regulated. GO term enrich analysis showed a significant enrichment on carbohydrate  
208 metabolic process and hydrolase activity of knot up-regulated, sclerotia up-regulated and  
209 oidia down-regulated genes. Expression level of “glucosidase” and “carboxy lyase activity”  
210 genes were up-regulated during hyphal knot and sclerotia development, while remained  
211 steady during oidia formation (Fig S3a). The shift on transcriptome indicates the re-  
212 distribution of materials and energy to fulfill the fruiting requirements. These results suggest  
213 that the determination of developmental paths is related to the internal regulation on  
214 carbohydrate metabolism and energy production and conversion.

### 215 **Gene expression in carbohydrate metabolic pathway explains carbon metabolic flux**

216 Up-regulated genes in hyphal knot and sclerotia were significantly and strongly enriched on  
217 carbohydrate metabolic pathways (Fig. S2b). Here, we put the carbohydrate content assay  
218 results and gene expression results together (Fig. 5). Compare to vegetative mycelium,  
219 glycogen phosphorylase and glucoamylase were up-regulated in all three reproductive  
220 structure forming paths (Fig. S3b). These enzymes catalyze glycogen into glucose-1-P and  
221 free glucose, providing materials and energy for the formation of complex reproductive  
222 structures. The higher expression level of glycogen degrading enzymes, the lower glycogen  
223 content in the culture.

224 Unlike in the favorable environment that oidia are formed, during the fruiting process and  
225 sclerotia forming process, not only the glycogen catabolism, but also the metabolism of beta-  
226 glucan and trehalose increased. Higher relative expression level on beta-glucan synthase and  
227 beta-glucanase indicates the stronger carbon flow that run into beta-glucan anabolism during  
228 sclerotia formation. Such prediction coincided with the observation of stronger beta-glucan

229 accumulation in sclerotia than hyphal knot. Although trehalose only took a tiny part of the dry  
230 weight in our study on *C. cinerea*, it is regarded as a carbon reserve and stress protectant in  
231 filamentous fungi, and found accumulating in resting cells such as spores and sclerotia (44,  
232 45). Up-regulation on gene expression of trehalose phosphatase and trehalose phosphate  
233 synthase matched with the trehalose content in hyphal knot higher than sclerotia and oidia.  
234 Depletion of trehalose content in the latter developmental stages might be caused by the co-  
235 expression of trehalase. Up-regulation on both anabolism and catabolism of beta-glucan and  
236 trehalose suggest the high intensity of cell wall remodeling and complexity of multicellular  
237 structure formation (Fig. S4). In short, our sampling time point can represent the turning  
238 point of developmental differentiation. Conversion between glucose and glycogen and  
239 conversion between glucose and beta-glucan are the main carbon flows in the differentiation  
240 processes. The carbon metabolic flux can be explained on transcriptome level.

#### 241 **Transcriptome age index and transcriptome divergence index profiles in developmental** 242 **paths differentiation**

243 To understand the transcriptome of developmental paths differentiation with evolutionary  
244 perspectives, we used transcriptome age index (TAI) and transcriptome divergence index  
245 (TDI) to estimate the evolutionary age and selective pressure of each developmental path  
246 (46–48). TAI and TDI was calculated based on either phylostrata (PS) or dN/dS ratio, and  
247 expression level of genes; the lower the TAI, the evolutionarily older the transcriptome; the  
248 lower the TDI with value less than 1, the stronger the force of purifying selection (48). The  
249 distributions of PS and dN/dS ratio of expressed genes in this study are shown in Fig. S6. We  
250 figured out that oidiation process expresses the evolutionarily oldest genes, next comes

251 sclerotia, and vegetative mycelium and hyphal knot express the evolutionarily younger genes.

252 All four developmental paths suffer from the strong selection force on the transcriptome.

253 Oidia transcriptome emitted the strongest signal of purifying selection, and hyphal knot

254 showed the weakest (Fig. 6a). Thus, oidia is the most conserved developmental path and

255 fruiting process is evolutionarily young and divergent.

256 Among the ten phylostrata, PS 1-2 are defined as old genes and PS 3-10 are defined as young

257 genes (48). Genes in PS 1-2 are in charge of basic cellular functions of eukaryotic cells.

258 Intermediate phylostrata (PS 3-9) correspond to the divergence from fungi to Agaricales

259 (gilled mushroom). Those genes mainly function on signal transduction and developmental

260 regulation, and they involve in the extracellular structure formation, defense, transcription,

261 RNA processing and modification, carbohydrate transportation and metabolism processes

262 (Fig. S5).

263 Protein coding genes that first emerged in domain Eukaryota (PS 2), Fungi (PS 3) and *C.*

264 *cinerea* (PS 10) contributed most to the TAI profile (Fig. 6b). Among four developmental

265 paths, oidia had high expression level of old genes (PS 1 and PS 2) and young gene group PS

266 3 and PS 5, but low expression level of other younger genes of PS 6-10 (Fig. 6c). On the

267 contrary, hyphal knot displayed high expression level on PS 5-9, the gilled mushroom-

268 specific genes, but low expression level in PS 1-3. Vegetative mycelium had high expression

269 level of PS 9-10. Genes from these two phylostrata are Agaricales-specific or *C. cinerea*

270 unique genes. These young genes display the functional enrichment on defense and

271 carbohydrate binding. In sclerotia, most of the metabolic processes slowed down under stress.

272 Sclerotia got the lowest expression level of old genes and relatively lower expression level of

273 young genes. The highest expression ratio of old genes to young genes occurred in oidia,  
274 followed by mycelium and hyphal knot, and sclerotia had the lowest ratio of zero (Fig. 6d).  
275 Interestingly, such ranking coincided with the evaluation on growing environment, from the  
276 most temperate to the most stressful. All these results indicate that oidiation, the asexual  
277 reproductive process, is generated from the common ancestor of eukaryota and conserved in  
278 current living organisms; while fruiting, the sexual reproductive process, is highly specific  
279 and evolutionarily adaptive.

### 280 **RNA editing events happened in all developmental paths**

281 In this study, a total of 245 RNA editing sites and 819 RNA editing events were identified in  
282 4 developmental paths. The RNA editome in developmental paths differentiation of *C.*  
283 *cinerea* is strongly different from those Ascomycetes fungi. The majority of RNA editing  
284 events had editing levels < 20 % (Fig. 7a), and the editing level remained constant and  
285 relatively low (Fig. 7b). T-to-C substitution took up over 55 % of the editing events (Fig. 7c).  
286 107, 111, 101 and 171 editing sites were detected in mycelium, hyphal knot, oidia and  
287 sclerotia, respectively (Fig. 7d). In *C. cinerea*, 44.1 % the RNA editing sites were annotated  
288 to the intergenic region and only 30.4 % are in the coding sequence (CDS, Fig. 7e). RNA  
289 editing events tend to appear on genes that are evolutionarily old and under strong purifying  
290 selection (Fig. S6).

291 To validate the RNA editing events, a selection of candidate sites was chosen to be amplified  
292 and sequenced using Sanger method. Site scaffold\_131:54938 was found edited in 9 of 12  
293 biological samples, with editing level of 3 – 70 %. Clear signal of double peaks showing T-to-  
294 C editing can be observed in 6 samples and the intensity of signals were consistent to the

295 RNA-seq results (Fig. 7f and Table S2). Single sequencing signal peak was observed in DNA  
296 and predicted unedited samples. This editing site is on a hypothetical protein (CC1G\_15451),  
297 and it is a synonymous variant on the transcript that codes alanine.

### 298 **Potential impact of RNA editing on gene expression regulation**

299 RNA editing site-containing genes were grouped according to their editing impact annotation  
300 and performed KOG enrichment analysis (Fig. S7). 31 and 40 RNA editing sites in CDS can  
301 cause either synonymous or nonsynonymous changes of the protein sequence. Six editing  
302 sites can generate splicing variants and transcript length variants (Table 1). Four of these  
303 editing containing genes, including anthranilate phosphoribosyltransferase, manganese  
304 superoxide dismutase, glyoxalase I and DNA-directed RNA polymerase II, only have single  
305 copy in the genome and all with unique function.

306 MicroRNAs could mediate post-transcriptional gene expression regulation by base pairing  
307 their seed region (2-7 nt at the 5'-end) to the UTR (49). RNA editing in 3' UTR can create or  
308 destroy the microRNA recognition sites, resulting in the changes of mRNA degradation and  
309 translational repression (50). 35 micro-RNA like RNA (miRNA) had been predicted in *C.*  
310 *cinerea* strain #326 and 7 of them were validated by reverse transcription-qPCR (Lau *et al*,  
311 unpublished data). Among 48 editing sites that locate in 3' UTR, 18 of them were predicted  
312 to interact with the known miRNA (Table 2). The T-to-C editing event at 3' UTR of thiamine  
313 biosynthetic bifunctional enzyme (scaffold\_76:107237, CC1G\_03317) could cause binding  
314 loss of validated miRNA cci-miR-32-3p and cci-miR-33-3p, and binding gain of predicted  
315 miRNA cci-miR-32-5p. Another T-to-C editing event at 3' UTR of glyceraldehyde-3-  
316 phosphate dehydrogenase (scaffold\_77:35473, CC1G\_09116) would create the miRNA

317 recognition site for the validated miRNA cci-miR-22.

## 318 **Discussion**

319 As a model mushroom-forming fungus, fruiting process of *C. cinerea* is well studied  
320 physiologically and genetically. In this study, we monitor the early developmental process of  
321 three destinies, fruiting, oidiation and sclerotia formation, with the reference of vegetative  
322 mycelium. Carbohydrate assays and high-throughput sequencing results all indicate the  
323 essential role of carbon metabolic flux in fungal morphogenesis. RNA editing, a co-/post-  
324 transcriptional modification which could rewrite the information in RNA, also prefers  
325 carbohydrate transport and metabolism transcripts. Evolutionary transcriptome analysis  
326 reveals the origin and selection of dispersal and survival strategies of *C. cinerea* (Fig. 8).  
327 Fruiting plays a pivotal role in fungal life cycle and attracts research attention (17, 51, 52).  
328 But we also need to know the role of oidiation and sclerotia formation in optimizing the  
329 dispersal and survival fitness of fungi under divergent environmental conditions (53). In this  
330 study, the most optimal to the most stressful environment for fungal development are ranked  
331 as the incubation conditions of oidiation, vegetative growth, fruiting and sclerotia formation.  
332 Nutrient, temperature and light are three critical environmental factors for the fruiting body  
333 development in mushroom-forming fungi (51). Light indicates open space to the fungi. In  
334 ascomycetes, light inhibits sexual reproduction but induces asexual development and produce  
335 tremendous amount of conidia (54). In *C. cinerea*, the combination of rich nutrient, optimum  
336 temperature and illumination results in the high production of genetically identical asexual  
337 spores, the oidia (40). Oidia contain ready-to-use materials for the rapid gemination, and with  
338 little resistant protective structures (55). Its high sensitivity to environmental stress will



339 restrict the dispersal of fungi (56). Oidiation process is energy-efficient but has little genetic  
340 flexibility. Oidia disperse rapidly in rare environments. The lack of light indicates the lack of  
341 open air (57). Under such circumstances, to grow connected hyphae, instead of releasable  
342 oidia, would be a more promising way to expand the habitat. When nutrient depletes, fungi  
343 changes their developmental strategies for long-distance dispersal and long-term survival (2,  
344 16, 58). Fruiting and sclerotia formation are both energy consuming processes because of the  
345 difficulty in forming highly organized multicellular structure (59). Thus, environmental stress  
346 like nutrient depletion is essential for the induction of fruiting and sclerotia formation.

347 Basidiospores and sclerotia possess thicker resistant layer than oidia and hyphae, and both of  
348 them are able to travel in distance and last for years (56, 60). Comparing to glycogen, beta-  
349 glucan is much difficult to be used or digested by other organisms. Storing beta-glucan as the  
350 carbon source for future usage is an energy-efficient choice in basidiospores and sclerotia  
351 (61–63). Like oidia, sclerotia also have little genetic flexibility. On the contrary,  
352 basidiospores benefit from the sexual propagation and high genotypic plasticity (64, 65).

353 Thus, basidiospores would adapt to the new habitat more successfully.

354 Evolutionary transcriptomic analysis has been performed in animal and plant embryogenesis  
355 and fungal fruiting (48, 66). The phylotranscriptomic hourglass pattern across kingdom  
356 illustrates the occurrence of complex multicellularity. Our results uncovered the correlation of  
357 environmental stress, developmental destinies and gene evolution in the life history of *C.*  
358 *cinerea*. Oidiation appears in highly favorable environment, genes express in this process are  
359 mainly those common to all eukaryotes and they are under strong purifying selection.

360 Regulation on gene expression ensure the unspecified process of oidia formation to be

361 performed accurately and sufficiently. Vegetative mycelium grows in changeable  
362 environment and it is in charge of primary occupation of new habitat. The Agaricales-specific  
363 and species unique genes are very likely to benefit the fungus on niche segmentation and  
364 adapting to the complex and changing environment during vegetative growth (38, 67, 68).  
365 High expression on species-specific genes and relative lower selective pressure of purifying  
366 selection enable mycelium to minimize the interspecific competition and improve fitness  
367 (69). Hyphal knots display similar transcriptome age as vegetative mycelium, but the former  
368 has higher transcriptome divergence. These indicate that the developmental process of  
369 fruiting body is relatively conserved, but genes of specific biological functions got diversity  
370 across genus (17, 48). Sclerotia function as the persistent resting structure which would need  
371 to suffer the extreme stressful environment (58). The relative old transcriptome age and  
372 strong purifying selection force of sclerotia suggest the common demand of overcoming  
373 stress and the importance of keeping such function in the genome for fungal species (70–72).  
374 The expression profile with phylostrata also indicates that the sclerotia formation process is  
375 highly divergent and with little similarity among different fungi (58, 70, 72).

376 As a special kind of transcriptional modification, RNA editing has been widely found in all  
377 domains of life and showed significant impacts on diverging the transcriptome and proteome  
378 (73–76). In fungi, developmentally regulated for sexual reproduction and evolutionarily  
379 conserved across genus are two main patterns of RNA editing events (35, 37, 38). Our results  
380 show that RNA editing not only occurs in fruiting, but also other developmental paths.  
381 Similar to the stage-specific and substrate-specific RNA editing studies on basidiomycetes,  
382 editing events in *C. cinerea* regulate the genes in carbohydrate metabolism and cell structure

383 formation (37, 38). All these results emphasize the functional similarity of RNA editing in  
384 regulating carbohydrate metabolism, and further, the essential role of carbon metabolism in  
385 fungal development. RNA editing show preference on genes that are old and under high  
386 purifying selection, revealing the special roles of RNA editing on providing plasticity to the  
387 transcriptome (34).

388 The profile of RNA editome of *C. cinerea* is similar to the previous studies in  
389 basidiomycetes, showing weak A-to-I editing preference (37, 38, 77). However, the number  
390 of called RNA editing events is significantly less. Moreover, compare to a basidiomycetes *G.*  
391 *lucidum* and two ascomycetes, *F. graminearum* and *N. crassa*, that over 60 % of the RNA  
392 editing sites are predicted to be in the CDS (35, 37, 78), only around 30 % of the RNA editing  
393 sites are in CDS in *C. cinerea*. Despite the differences of species from distant order, we refer  
394 that the low editing density is caused by the usage of a homokaryotic strain, also by the much  
395 stricter filtering parameters. In addition, we resequenced the genome of strain #326 as a  
396 reference to exclude false positive events introduced by inaccuracy in genome assembly and  
397 genome variants. We have blast out 3 adenosine deaminases acting on tRNA (ADATs)  
398 homologs in the genome, but no adenosine deaminases acting on RNA (ADARs) homolog  
399 (37, 78). The mechanism of RNA editing in *C. cinerea* remains unknown.

## 400 **Conclusions**

401 Responding to the environmental conditions, *C. cinerea* follows different developmental  
402 paths including vegetative growth, oidiation, fruiting and sclerotia formation. In these paths,  
403 genes are differentially expressed and RNA editing occurred. Carbohydrate metabolism is  
404 strictly regulated and differs dramatically. Glycogen is produced as storage carbon source to

405 provide energy in the early developmental stages. Stored glycogen is converted into beta-  
406 glucan during fruiting or sclerotia formation. Carbon metabolic flux is regulated to fulfill the  
407 demands of short-term usage and long-term survival adapting to the specific environmental  
408 conditions. Phylotranscriptomic analysis showed that oidiation happens in favorable  
409 environments, and has the oldest transcriptome age and the lowest transcriptome divergence.  
410 Developmental paths of fruiting and sclerotia formation that occur in stress environments  
411 have evolutionarily younger genes expressed, and display younger transcriptome age and  
412 higher transcriptome divergence. Editome analysis showed that RNA editing occurs in all  
413 developmental paths and is developmentally regulated. RNA editing appears to regulate  
414 carbohydrate metabolism genes at both transcriptional and post-transcriptional levels. These  
415 events provide more plasticity to the transcriptome and show preferences on conserved genes.  
416 In short, the differentiation of developmental paths in *C. cinerea* is regulated transcriptionally  
417 and post-transcriptionally, with major changes in carbon metabolic flux.

## 418 **Materials and methods**

### 419 **Strain**

420 The homokaryotic fruiting strain *C. cinerea* #326 (A43mut B43mut pab1-1) was grown at  
421 37 °C on solid YMG medium for 5 days before reaching the edge of the 90 mm petri dish to  
422 obtain the working stock plates. Culture condition, growth rate measurement, and sample  
423 collection for carbohydrate content determination and RNA sequencing are described in  
424 supplementary methods (Text S1).

### 425 **RNA-seq library preparation and sequencing**

426 RNA with three biological replicates of each path were proceeded to RNA-seq. About 5 µg of  
427 total RNA for each sample was sent to the Beijing Genomics Institute (BGI, Shenzhen,  
428 China) for library construction and sequencing. The unstranded RNA library was prepared  
429 using TruSeq RNA Sample Prep Kit v2 (Illumina, USA), and sequenced with Illumina  
430 HiSeq® 4000 at the 2×150 bp paired-end read mode. *In silico* analysis on transcriptome,  
431 including reads alignment, DEG detection, functional classification and phylotranscriptomic  
432 analysis, is described in supplementary methods (Text S1). RNA editing sites was called by  
433 REDIttools v1.0.4 (79), parameters used are also listed in supplementary methods (Text S1).

#### 434 **DNA extraction and genome resequencing**

435 Genomic DNA was extracted from vegetative mycelium of *C. cinerea* using DNeasy Plant  
436 Mini Kit (Qiagen, Germany). DNA sequencing library was prepared with insert size of 270  
437 bp and sequenced with Illumina HiSeq® 4000 at the 2×150 bp paired-end read mode. 9.2  
438 million clean reads and 1.38 billion clean bases were obtained. Reads were aligned to the  
439 reference genome of *C. cinerea* strain #326 released in Genome portal of Joint Genome  
440 Institute ([https://mycocosm.jgi.doe.gov/Copci\\_AmutBmut1/Copci\\_AmutBmut1.home.html](https://mycocosm.jgi.doe.gov/Copci_AmutBmut1/Copci_AmutBmut1.home.html))  
441 using Bowtie2 (80).

#### 442 **qRT-PCR validation**

443 Quantitative real-time PCR (qRT-PCR) was used to validate the RNA-seq results. cDNA was  
444 synthesized from total RNA with anchored-oligo(dT)<sub>18</sub> primer and random hexamer primer  
445 using Transcriptor First Strand cDNA Synthesis Kit (Roche, Germany). The template-primer  
446 mix was denaturalized at 65 °C, and the RT reaction was incubated as follows: 10 min at 25 °C,

447 30 min at 55 °C and 5 min at 85 °C. 1 µg of RNA was input into each 20 µl RT reaction.  
448 Several genes were selected, and the expression was quantitatively measured using  
449 SsoAdvanced™ Universal SYBR® Green Supermix (Bio-Rad, USA) with Applied  
450 Biosystems™ 7500 fast Real-Time PCR System (Applied Biosystems, USA). PCR reactions  
451 were performed as the following program: 30 sec at 95 °C, followed by 40 cycles 15 sec at  
452 95 °C and 30 sec at 60 °C, instrument default setting on melt-curve analysis. 18S is used as  
453 the internal control. Primer used in this study are listed in supplementary methods (Text S1).

#### 454 **Validation of RNA editing sites**

455 PCR amplification of RNA editing containing sequence were performed by using cDNA and  
456 gDNA as templates with KAPA HiFi HotStart ReadyMix PCR kit (Roche, Germany) and the  
457 following program: 95 °C for 3 min, followed by 30 cycles 98 °C for 20 sec, 65 °C for 20  
458 sec, and 72 °C for 15 sec, and 72 °C for 1 min. PCR products are detected on 1.5 % agarose  
459 gel and purified with MEGA quick-spin Plus Fragment DNA Purification Kit (MEGA,  
460 Korea). Sanger sequencing of PCR products were performed by BGI.

#### 461 **Data availability**

462 Sequencing data of this study have been submitted to the NCBI Sequence Read Archive  
463 (SRA, <http://www.ncbi.nlm.nih.gov/sra>) under BioProject accession numbers PRJNA573619  
464 and PRJNA573620.

#### 465 **Acknowledgements**

466 We would like to thank Dr. Hajime Muraguchi for kindly sharing the *C. cinerea* strain #326  
467 with us. We would also like to thank Xuanjin Cheng and Man Kit Cheung for the fruitful

468 discussion.

469 This work was supported by the RGC General Research Fund (GRF 14116916 and GRF  
470 14103817) provided by the Research Grants Council of HKSAR, PRC. The funders had no  
471 role in study design, data collection and interpretation, or the decision to submit the work for  
472 publication.

473

474 **References**

- 475 1. Raudaskoski M. 2015. Mating-type genes and hyphal fusions in filamentous  
476 basidiomycetes. *Fungal Biol Rev* 29:179–193.
- 477 2. Halbwachs H, Simmel J, Bässler C. 2016. Tales and mysteries of fungal fruiting: How  
478 morphological and physiological traits affect a pileate lifestyle. *Fungal Biol Rev* 30:36–  
479 61.
- 480 3. Sipos G, Prasanna AN, Walther MC, O’Connor E, Balint B, Krizsan K, Kiss B, Hess J,  
481 Slot J, Riley R, Boka B, Rigling D, Barry K, Lee J, Mihaltseva S, Labutti K, Lipzen A,  
482 Waldron R, Moloney N, Sperisen C, Kredics L, Vagvolgyi C, Patrigniani A, Fitzpatrick  
483 D, Nagy I, Doyle S, Anderson JB, Grigoriev I V., Guldener U, Munsterkötter M, Varga  
484 T, Nagy LG. 2017. Genome expansion and lineage-specific genetic innovations in the  
485 world’s largest organisms (*Armillaria*). *Nat Ecol Evol* 1:1931–1941.
- 486 4. Kűes U. 2000. Life history and developmental processes in the basidiomycete *Coprinus*  
487 *cinereus*. *Microbiol Mol Biol Rev* 64:316–53.
- 488 5. Gomez-Zavaglia A, Shaohua S, Zeng F, Zhu W, Zhang S, Hu B, Wei W, Xiong Y, Peng  
489 F, Yu Y, Zheng Y, Chen P. 2016. *De novo* analysis of *Wolfiporia cocos* transcriptome to  
490 reveal the differentially expressed carbohydrate-active enzymes (CAZymes) genes  
491 during the early stage of sclerotial growth. *Front Microbiol* 7:83.
- 492 6. Rodenburg SYA, Terhem RB, Veloso J, Stassen JHM, van Kan JAL. 2018. Functional  
493 analysis of mating type genes and transcriptome analysis during fruiting body  
494 development of *Botrytis cinerea*. *MBio* 9:e01939-17.



- 495 7. Erental A, Dickman MB, Yarden O. 2008. Sclerotial development in *Sclerotinia*  
496 *sclerotiorum*: awakening molecular analysis of a “Dormant” structure. *Fungal Biol Rev*  
497 22:6–16.
- 498 8. Stajich JE, Wilke SK, Ahrén D, Au CH, Birren BW, Borodovsky M, Burns C, Canbäck  
499 B, Casselton LA, Cheng CK, Deng J, Dietrich FS, Fargo DC, Farman ML, Gathman AC,  
500 Goldberg J, Guigó R, Hoegger PJ, Hooker JB, Huggins A, James TY, Kamada T, Kilaru  
501 S, Kodira C, Kües U, Kupfer D, Kwan HS, Lomsadze A, Li W, Lilly WW, Ma L-J,  
502 Mackey AJ, Manning G, Martin F, Muraguchi H, Natvig DO, Palmerini H, Ramesh MA,  
503 Rehmeyer CJ, Roe BA, Shenoy N, Stanke M, Ter-Hovhannisyan V, Tunlid A,  
504 Velagapudi R, Vision TJ, Zeng Q, Zolan ME, Pukkila PJ. 2010. Insights into evolution  
505 of multicellular fungi from the assembled chromosomes of the mushroom *Coprinopsis*  
506 *cinerea* (*Coprinus cinereus*). *Proc Natl Acad Sci U S A* 107:11889–94.
- 507 9. Muraguchi H, Umezawa K, Niikura M, Yoshida M, Kozaki T, Ishii K, Sakai K, Shimizu  
508 M, Nakahori K, Sakamoto Y, Choi C, Ngan CY, Lindquist E, Lipzen A, Tritt A, Haridas  
509 S, Barry K, Grigoriev I V., Pukkila PJ. 2015. Strand-specific RNA-seq analyses of  
510 fruiting body development in *Coprinopsis cinerea*. *PLoS One* 10:e0141586.
- 511 10. Nunes LR, Costa de Oliveira R, Leite DB, da Silva VS, dos Reis Marques E, da Silva  
512 Ferreira ME, Ribeiro DCD, de Souza Bernardes LA, Goldman MHS, Puccia R,  
513 Travassos LR, Batista WL, Nóbrega MP, Nobrega FG, Yang D-Y, de Bragança Pereira  
514 CA, Goldman GH. 2005. Transcriptome analysis of *Paracoccidioides brasiliensis* cells  
515 undergoing mycelium-to-yeast transition. *Eukaryot Cell* 4:2115–28.

- 516 11. Fu Y, Dai Y, Yang C, Wei P, Song B, Yang Y, Sun L, Zhang Z-W, Li Y. 2017. Comparative  
517 transcriptome analysis identified candidate genes related to Bailinggu mushroom  
518 formation and genetic markers for genetic analyses and breeding. *Sci Rep* 7:9266.
- 519 12. Wen J, Zhang Z, Gong L, Xun H, Li J, Qi B, Wang Q, Li X, Li Y, Liu B. 2019.  
520 Transcriptome changes during major developmental transitions accompanied with little  
521 alteration of DNA methylome in two *Pleurotus* species. *Genes (Basel)* 10:465.
- 522 13. Dörnte B, Kües U. 2012. Reliability in transformation of the basidiomycete *Coprinopsis*  
523 *cinerea*. *Curr Trends Biotechnol Pharm* 6:340–355.
- 524 14. Srivilai P, Loutchanwo P. 2009. *Coprinopsis cinerea* as a model fungus to evaluate genes  
525 underlying sexual development in basidiomycetes. *Pakistan J Biol Sci* 12:821–835.
- 526 15. Watanabe T, Tagawa M, Tamaki H, Hanada S, Watanabe T, Tagawa ÁM, Tamaki ÁH,  
527 Hanada ÁS. 2011. *Coprinopsis cinerea* from rice husks forming sclerotia in agar culture.  
528 *Mycoscience* 52:152–156.
- 529 16. Moore D, Jirjis RI. 1976. Regulation of sclerotium production by primary metabolites  
530 in *Coprinus cinereus* (= *C. lagopus* sensu lewis). *Trans Br Mycol Soc* 66:377–382.
- 531 17. Krizsán K, Almási É, Merényi Z, Sahu N, Virágh M, Kószó T, Mondo S, Kiss B, Bálint  
532 B, Kües U, Barry K, Cseklye J, Hegedüs B, Henrissat B, Johnson J, Lipzen A, Ohm RA,  
533 Nagy I, Pangilinan J, Yan J, Xiong Y, Grigoriev I V, Hibbett DS, Nagy LG. 2019.  
534 Transcriptomic atlas of mushroom development reveals conserved genes behind  
535 complex multicellularity in fungi. *Proc Natl Acad Sci U S A* 116:7409–7418.
- 536 18. Daran-Lapujade P, Jansen MLA, Daran J-M, van Gulik W, de Winde JH, Pronk JT. 2004.

- 537 Role of transcriptional regulation in controlling fluxes in central carbon metabolism of  
538 *Saccharomyces cerevisiae*. A chemostat culture study. *J Biol Chem* 279:9125–38.
- 539 19. Carreira R, Evangelista P, Maia P, Vilaça P, Pont M, Tomb J-F, Rocha I, Rocha M. 2014.  
540 CBFA: phenotype prediction integrating metabolic models with constraints derived from  
541 experimental data. *BMC Syst Biol* 8:123.
- 542 20. Lagziel S, Lee WD, Shlomi T. 2019. Studying metabolic flux adaptations in cancer  
543 through integrated experimental-computational approaches. *BMC Biol* 17:51.
- 544 21. Traven A, Jänicke A, Harrison P, Swaminathan A, Seemann T, Beilharz TH. 2012.  
545 Transcriptional profiling of a yeast colony provides new insight into the heterogeneity  
546 of multicellular fungal communities. *PLoS One* 7:e46243.
- 547 22. Busch S, Braus GH. 2007. How to build a fungal fruit body: from uniform cells to  
548 specialized tissue. *Mol Microbiol* 64:873–876.
- 549 23. Andoh T, Hirata Y, Kikuchi A. 2000. Yeast Glycogen Synthase Kinase 3 Is Involved in  
550 Protein Degradation in Cooperation with Bul1, Bul2, and Rsp5. *Mol Cell Biol* 20:6712–  
551 6720.
- 552 24. Bidochka MJ, Low NH, Khachatourians GG. 1990. Carbohydrate storage in the  
553 entomopathogenic fungus *Beauveria bassiana*. *Appl Environ Microbiol* 56:3186–90.
- 554 25. Brunt IC, Moore D. 1989. Intracellular glycogen stimulates fruiting in *Coprinus cinereus*.  
555 *Mycol Res* 93:543–546.
- 556 26. Jirjis RI, Moore D. 1976. Involvement of glycogen in morphogenesis of *Coprinus*  
557 *cinereus*. *J Gen Microbiol* 95:348–352.

- 558 27. Qin J, Wang G, Jiang C, Xu J-R, Wang C. 2015. Fgk3 glycogen synthase kinase is  
559 important for development, pathogenesis, and stress responses in *Fusarium*  
560 *graminearum*. Sci Rep 5:8504.
- 561 28. Chen S, Xu J, Liu C, Zhu Y, Nelson DR, Zhou S, Li C, Wang L, Guo X, Sun Y, Luo H,  
562 Li Y, Song J, Henrissat B, Levasseur A, Qian J, Li J, Luo X, Shi L, He L, Xiang L, Xu  
563 X, Niu Y, Li Q, Han M V, Yan H, Zhang J, Chen H, Lv A, Wang Z, Liu M, Schwartz DC,  
564 Sun C. 2012. Genome sequence of the model medicinal mushroom *Ganoderma lucidum*.  
565 Nat Commun 3:913.
- 566 29. Sakamoto Y, Nakade K, Konno N. 2011. Endo- $\beta$ -1,3-glucanase GLU1, from the fruiting  
567 body of *Lentinula edodes*, belongs to a new glycoside hydrolase family. Appl Environ  
568 Microbiol 77:8350–4.
- 569 30. Fukuda K, Hiraga M, Asakuma S, Arai I, Seikikawa M, Urashima T. 2008. Purification  
570 and characterization of a novel Exo- $\beta$ -1,3-1,6-glucanase from the fruiting body of the  
571 edible mushroom Enoki (*Flammulina velutipes*). Biosci Biotechnol Biochem 72:3107–  
572 3113.
- 573 31. Wang J, Zhang W, Zhou Y, Yuan S, Liu Z. 2015. Purification, characterization and  
574 synergism in autolysis of a group of 1,3- $\beta$ -glucan hydrolases from the pilei of  
575 *Coprinopsis cinerea* fruiting bodies. Microbiology 161:1978–1989.
- 576 32. Nowrousian M. 2018. Genomics and transcriptomics to study fruiting body development:  
577 An update. Fungal Biol Rev 32:231–235.
- 578 33. Horton TL, Landweber LF. 2002. Rewriting the information in DNA: RNA editing in

- 579 kinetoplastids and myxomycetes. *Curr Opin Microbiol* 5:620–6.
- 580 34. Liscovitch-Brauer N, Alon S, Porath HT, Elstein B, Unger R, Ziv T, Admon A, Levanon  
581 EY, Rosenthal JJC, Eisenberg E. 2017. Trade-off between transcriptome plasticity and  
582 genome evolution in cephalopods. *Cell* 169:191-202.e11.
- 583 35. Liu H, Li Y, Chen D, Qi Z, Wang Q, Wang J, Jiang C, Xu J-R. 2017. A-to-I RNA editing  
584 is developmentally regulated and generally adaptive for sexual reproduction in  
585 *Neurospora crassa*. *Proc Natl Acad Sci* 114:E7756–E7765.
- 586 36. Liu J, Wang D, Su Y, Lang K, Duan R, Wu YF, Ma F, Huang S. 2019. FairBase: a  
587 comprehensive database of fungal A-to-I RNA editing. *Database* (Oxford) 2019.
- 588 37. Zhu Y, Luo H, Zhang X, Song J, Sun C, Ji A, Xu J, Chen S. 2014. Abundant and selective  
589 RNA-editing events in the medicinal mushroom *Ganoderma lucidum*. *Genetics*  
590 196:1047–1057.
- 591 38. Wu B, Gaskell J, Zhang J, Toapanta C, Ahrendt S, Grigoriev I V., Blanchette RA,  
592 Schilling JS, Master E, Cullen D, Hibbett DS. 2019. Evolution of substrate-specific gene  
593 expression and RNA editing in brown rot wood-decaying fungi. *ISME J* 13:1391–1403.
- 594 39. Kim J-S, Kwon Y-S, Bae D-W, Kwak Y-S, Kwack Y-B. 2017. Proteomic analysis of  
595 *Coprinopsis cinerea* under conditions of horizontal and perpendicular gravity.  
596 *Mycobiology* 45:226.
- 597 40. Kertesz-Chaloupková K, Walser PJ, Granado JD, Aebi M, Kü Es U, Kertesz-  
598 Chaloupkova K, Walser PJ, Granado JD. 1998. Blue light overrides repression of asexual  
599 sporulation by mating type genes in the basidiomycete *Coprinus cinereus*. *Fungal Genet*

600 Biol 23:95–109.

- 601 41. Kuè Es U, Granado JD, Hermann R, Boulianne RP, Kertesz-Chaloupkovaâ K, Aebi M.  
602 1998. The A mating type and blue light regulate all known differentiation processes in  
603 the basidiomycete *Coprinus cinereus*. *Mol Gen Genet* 260:81–91.
- 604 42. Moore D. 1981. Developmental genetics of *Coprinus cinereus*: Genetic evidence that  
605 carpophores and sclerotia share a common pathway of initiation. *Curr Genetics* 3:145–  
606 150.
- 607 43. Swamy S, U I. 1984. Morphogenetic effects of mutations at the A and B incompatibility  
608 factors in *Coprinus cinereus*. *J Gen Microbiol* 130:3219–3224.
- 609 44. Thevelein JM. 1984. Regulation of trehalose mobilization in fungi. *Microbiol Rev*  
610 48:42–59.
- 611 45. Jorge JA, Polizeli M de LT., Thevelein JM, Terenzi HF. 2006. Trehalases and trehalose  
612 hydrolysis in fungi. *FEMS Microbiol Lett* 154:165–171.
- 613 46. Domazet-Lošo T, Tautz D. 2010. A phylogenetically based transcriptome age index  
614 mirrors ontogenetic divergence patterns. *Nature* 468:815–818.
- 615 47. Quint M, Drost H-G, Gabel A, Ullrich KK, Bönn M, Grosse I. 2012. A transcriptomic  
616 hourglass in plant embryogenesis. *Nature* 490:98–101.
- 617 48. Cheng X, Hui JHL, Lee YY, Law PTW, Kwan HS. 2015. A “developmental hourglass”  
618 in fungi. *Mol Biol Evol* 32:1556–1566.
- 619 49. Bartel DP. 2009. MicroRNAs: target recognition and regulatory functions. *Cell*

- 620 136:215–233.
- 621 50. Eisenberg E, Levanon EY. 2018. A-to-I RNA editing — immune protector and  
622 transcriptome diversifier. *Nat Rev Genet* 19:473–490.
- 623 51. Sakamoto Y. 2018. Influences of environmental factors on fruiting body induction,  
624 development and maturation in mushroom-forming fungi. *Fungal Biol Rev* 32:236–248.
- 625 52. Kues U, Navarro-González M. 2015. How do Agaricomycetes shape their fruiting  
626 bodies? 1. Morphological aspects of development. *Fungal Biol Rev* 29:63–97.
- 627 53. Cooke WB. 1951. Ecological life history outlines for fungi. *Ecology* 32:736–748.
- 628 54. Fuller KK, Loros JJ, Dunlap JC. 2015. Fungal photobiology: visible light as a signal for  
629 stress, space and time. *Curr Genet* 61:275–288.
- 630 55. Polak E, Hermann R, Kues U, Aebi M. 1997. Asexual sporulation in *Coprinus cinereus*:  
631 Structure and development of oidiophores and oidia in an Amut Bmut homokaryon.  
632 *Fungal Genet Biol* 22:112–126.
- 633 56. Norros V, Karhu E, Nordén J, Vähätalo A V, Ovaskainen O. 2015. Spore sensitivity to  
634 sunlight and freezing can restrict dispersal in wood-decay fungi. *Ecol Evol* 5:3312–3326.
- 635 57. Rodriguez-Romero J, Hedtke M, Kastner C, Müller S, Fischer R. 2010. Fungi, hidden  
636 in soil or up in the air: light makes a difference. *Annu Rev Microbiol* 64:585–610.
- 637 58. Coley-Smith JR, Cooke RC. 1971. Survival and germination of fungal sclerotia. *Annu*  
638 *Rev Phytopathol* 9:65–92.
- 639 59. Waters H, Butler RD, Moore D. 1975. Structure of aerial and submerged sclerotia of

- 640        *Coprinus lagopus*. *New Phytol* 74:199–205.
- 641    60.    Golan JJ, Pringle A. 2017. Long-distance dispersal of fungi, p. 309–333. *In* *The Fungal*  
642        *Kingdom*. American Society of Microbiology.
- 643    61.    Schreiner KM, Blair NE, Levinson W, Egerton-Warburton LM. 2014. Contribution of  
644        fungal macromolecules to soil carbon sequestration, p. 155–161. *In* *Soil Carbon*.  
645        Springer International Publishing, Cham.
- 646    62.    Caldwell BA. 2005. Enzyme activities as a component of soil biodiversity: A review, p.  
647        637–644. *In* *Pedobiologia*. Urban & Fischer.
- 648    63.    Sollins P, Homann P, Caldwell BA. 1996. Stabilization and destabilization of soil  
649        organic matter: Mechanisms and controls. *Geoderma* 74:65–105.
- 650    64.    Wallen RM, Perlin MH. 2018. An overview of the function and maintenance of sexual  
651        reproduction in dikaryotic fungi. *Front Microbiol*. Frontiers Media SA.
- 652    65.    Heitman J. 2015. Evolution of sexual reproduction: A view from the fungal kingdom  
653        supports an evolutionary epoch with sex before sexes. *Fungal Biol Rev*. Elsevier.
- 654    66.    Drost H-G, Gabel A, Grosse I, Quint M. 2015. Evidence for active maintenance of  
655        phylotranscriptomic hourglass patterns in animal and plant embryogenesis. *Mol Biol*  
656        *Evol* 32:1221–31.
- 657    67.    Ah-Fong AMV, Kagda MS, Abrahamian M, Judelson HS. 2019. Niche-specific  
658        metabolic adaptation in biotrophic and necrotrophic oomycetes is manifested in  
659        differential use of nutrients, variation in gene content, and enzyme evolution. *PLOS*  
660        *Pathog* 15:e1007729.



- 661 68. Naranjo-Ortiz MA, Gabaldón T. 2019. Fungal evolution: major ecological adaptations  
662 and evolutionary transitions. *Biol Rev* 94:brv.12510.
- 663 69. Gladieux P, Ropars J, Badouin H, Branca A, Aguilera G, de Vienne DM, Rodríguez de  
664 la Vega RC, Branco S, Giraud T. 2014. Fungal evolutionary genomics provides insight  
665 into the mechanisms of adaptive divergence in eukaryotes. *Mol Ecol* 23:753–773.
- 666 70. Calvo AM, Cary JW. 2015. Association of fungal secondary metabolism and sclerotial  
667 biology. *Front Microbiol* 6:62.
- 668 71. Hoshino T, Xiao N, Tkachenko OB. 2009. Cold adaptation in the phytopathogenic fungi  
669 causing snow molds. *Mycoscience* 50:26–38.
- 670 72. Willetts HJ, Bullock S. 1992. Developmental biology of sclerotia. *Mycol Res* 96:801–  
671 816.
- 672 73. Yablonovitch AL, Deng P, Jacobson D, Li JB. 2017. The evolution and adaptation of A-  
673 to-I RNA editing. *PLOS Genet* 13:e1007064.
- 674 74. Song C, Sakurai M, Shiromoto Y, Nishikura K. 2016. Functions of the RNA editing  
675 enzyme ADAR1 and their relevance to human diseases. *Genes (Basel)* 7:129.
- 676 75. Zhou F, Lou Q, Wang B, Xu L, Cheng C, Lu M, Sun J. 2016. Altered carbohydrates  
677 allocation by associated bacteria-fungi interactions in a bark beetle-microbe symbiosis.  
678 *Sci Rep* 6:20135.
- 679 76. Licht K, Jantsch MF. 2016. Rapid and dynamic transcriptome regulation by RNA editing  
680 and RNA modifications. *J Cell Biol* 213:15–22.

- 681 77. Wu B, Gaskell J, Held BW, Toapanta C, Vuong T, Ahrendt S, Lipzen A, Zhang J,  
682 Schilling JS, Master E, Grigoriev I V, Blanchette RA, Cullen D, Hibbett DS. 2018.  
683 Substrate-specific differential gene expression and RNA editing in the brown rot fungus  
684 *Fomitopsis pinicola*. *Appl Environ Microbiol* 84:e00991-18.
- 685 78. Liu H, Wang Q, He Y, Chen L, Hao C, Jiang C, Li Y, Dai Y, Kang Z, Xu JR. 2016.  
686 Genome-wide A-to-I RNA editing in fungi independent of ADAR enzymes. *Genome*  
687 *Res* 26:499–509.
- 688 79. Picardi E, Pesole G. 2013. REDIttools: High-throughput RNA editing detection made  
689 easy. *Bioinformatics* 29:1813–1814.
- 690 80. Langmead B, Salzberg SL. 2012. Fast gapped-read alignment with Bowtie 2. *Nat*  
691 *Methods* 9:357–359.

692

693

694 **Tables**

695 Table 1. RNA editing events result in splicing variants and transcript length variants.

696 Table 2. Interaction between RNA editing sites and miRNA. \* for RT-qPCR validated  
697 miRNA.

698 **Figures**

699 Fig 1. Developmental paths of *Coprinopsis cinerea* and experimental design. Mycelial punch  
700 was inoculated to each cellophane covered YMG plate and then incubated under different  
701 environment. Time scale bars indicate days post inoculation (dpi) and light exposure  
702 (white) or dark incubation (black) of each developmental process. Arrows indicate  
703 sample collection of time point a (before structure formation, developing colony, orange)  
704 and b (structure formed, developed colony, green).

705 Fig 2. Carbohydrate content in different developmental paths. Error bar showing the standard  
706 deviation of 5 biological replicates. Statistic results present in Table S1.

707 Fig 3. Transcriptome profiles of four developmental paths. (a-b) Hierarchical clustering of  
708 RNA samples using FPKM values with Pearson's correlation (a) and Spearman's  
709 correlation (b). (c) Number of DEGs between vegetative mycelium and other three  
710 developmental paths. (d) Venn diagram showing the DEGs shared by different  
711 developmental paths. (e) Volcano plots showing distributions of DEGs, taking gene  
712 expression levels in vegetative mycelium as reference, grey dots showing non-DEGs.

713 Fig 4. KOG enrichment analysis on DEGs on reproductive development. Number of  
714 annotated genes are listed below. Number beside KOG terms indicates number of genes

715 being annotated to the node in the genome. Ratio is calculated by annotated genes of  
716 specific KOG term in each DEG group over annotated genes of specific KOG term in the  
717 genome background. Enrichment groups with Benjamini and Hochberg method (BH)  
718 adjusted p value  $\leq 0.20$  are shaded in red to blue color, others are in grey.

719 Fig 5. Gene expression level reflects the carbohydrate metabolic flux. Spider plots show  
720 content of different type of carbohydrate, arrows indicate the conversion from substrate  
721 to product. Thickness of the arrow indicates relative value of expression level of enzyme  
722 coding gene. Red arrows indicate up-regulation of expression level compare to  
723 vegetative mycelia, green arrows indicate down-regulation (none), and blue arrows  
724 indicate that the expression level is not significantly changed.

725 Fig 6. Evolutionary transcriptome profiles of developmental paths. (a) TAI and TDI values of  
726 different developmental paths. TAI quantifies the mean evolutionary age of a  
727 transcriptome. The lower the TAI, the evolutionarily older the transcriptome; TDI  
728 quantifies the mean selection force acting on a transcriptome. The lower the TDI, the  
729 stronger the force of purifying selection, giving its value less than 1. Error bars showing  
730 95 % confidence interval estimated by bootstrap sampling for 1000 times. Lowercase  
731 letters showing TAI/TDI values that are significantly different among developmental  
732 paths in multiple comparisons ( $p < 0.05$ ). (b) Contribution of each PS to the TAI: PS 3 >  
733 PS 2 > PS 10 > PS 7 > PS 6 > PS 9 > PS 4  $\approx$  PS 5 > PS 1 > PS 8. (c) Relative expression  
734 level of genes from each PS across developmental paths. (d) Mean relative expression  
735 level of old genes (PS 1-2) and young genes (PS 3-10) over developmental paths.  
736 Relative expression level (RE) of PS 1 and PS 2 in oidia are the same and equal to 1, RE

737 of PS 1 and PS 2 in sclerotia are the same and equal to 0.

738 Fig 7. Properties of RNA editing sites and RNA editing events. (a) Histogram showing  
739 editing the frequency of 819 RNA editing events. (b) The number of each type of RNA  
740 editing events per million mapped reads in different developmental stages. (c) Box plots  
741 showing RNA editing levels of RNA editing events in different developmental paths. (d)  
742 Venn diagram showing the number of RNA editing sites shared by different  
743 developmental paths. (e) The distribution of 245 RNA editing sites. (f) Sanger  
744 sequencing validates T-to-C RNA editing events on scaffold\_131:54938 (- strand), blue  
745 arrow indicates editing site.

746 Fig 8. Properties of developmental paths differentiation in *C. cinerea*.

#### 747 **Supplementary materials**

#### 748 **Supplementary text**

749 Text S1. Supplementary methods.

#### 750 **Supplementary tables**

751 Table S1. Carbohydrate content in different developmental paths. Multiple comparison results  
752 are shown with groups.

753 Table S2. Validation of RNA editing events with Sanger sequencing. RNA editing candidate  
754 scaffold\_131:54938 (- strand), T-to-C editing show in red box. \* for RNA editing events  
755 being significantly observed.

#### 756 **Supplementary figures**

757 Fig S1. Growth status of colonies. oidia production (a) and mycelium growth (b) when

758 incubated in 37 °C with continuous light or continuous dark.

759 Fig S2. GO (a) and KEGG (b) enrichment analysis on DEGs on reproductive development.

760 Number of annotated genes are listed below each DEG group. Number beside GO terms

761 indicates number of genes being annotated to the node in the genome. Ratio is calculated

762 by annotated genes of specific GO term in each DEG group over annotated genes of

763 specific GO term in the genome background. Enrichment groups with Benjamini and

764 Hochberg method (BH) adjusted p value  $\leq 0.20$  are shaded in red to blue color, others are

765 in grey.

766 Fig. S3. (a)  $\text{Log}_2$ FPKM of genes on starch and sucrose metabolism pathway cci00500. (b)

767 qPCR validation of gene expression on carbohydrate metabolic pathway related genes.

768 Fig S4.  $\text{Log}_2$  fold change values of genes related to KOG group of (a) carbohydrate transport

769 and metabolism; (b) energy production and conversion; (c) mycelial structure formation.

770 Fig. S5. KOG enrichment analysis (a) and GO enrichment analysis (GO term level 3, b) of

771 phylostrata. Number below each PS shows number of annotated genes in specific PS.

772 Number beside KOG/GO terms indicates number of genes being annotated to the node in

773 the genome. Ratio is calculated by genes of specific PS annotated to the KOG/GO term

774 over annotated genes of specific PS. For GO enrichment, ratio  $\geq 0.1$  are plotted.

775 Enrichment groups with Benjamini and Hochberg method (BH) adjusted p value  $\leq 0.20$

776 are shaded in red to blue color, others are in grey.

777 Fig S6. Evolutionary transcriptome and RNA editome profiles of *C. cinerea* development.

778 Distribution of Phylostrata (a) and dN/dS ratio (b) of all expressed genes (upper panel)  
779 and RNA editing site containing genes (lower panel). Red dot line showing the mean.  
780 RNA editing site containing genes are evolutionarily older in the genome. (c) and (d)  
781 shows percentage of RNA editing containing genes in each phylostrata or dN/dS group.

782 Fig S7. KOG enrichment analysis of RNA editing sites. 245 editing sites in total. Number  
783 before each annotation category shows number of RNA editing sites with specific  
784 functional annotation predicted by snpEff. Number beside KOG terms indicates number  
785 of genes being annotated to the node in the genome. Ratio is calculated by genes of  
786 specific functional category annotated to the KOG term over annotated genes of specific  
787 KOG term in the genome background. Enrichment groups with Benjamini and Hochberg  
788 method (BH) adjusted p value  $\leq 0.20$  are shaded in red to blue color, others are in grey.  
789

Table 1. RNA editing events result in splicing variants and transcript length variants.

| <b>RNA editing position</b> | <b>Editing impact</b>                      | <b>Annotation</b>                      | <b>Okayama-7 #130 ID</b> |
|-----------------------------|--------------------------------------------|----------------------------------------|--------------------------|
| scaffold_250:38334          | Splice acceptor variant and intron variant | Anthranilate phosphoribosyltransferase | CC1G_02982               |
| scaffold_194:26812          | Splice region variant and intron variant   | DNA-directed RNA polymerase II         | CC1G_02497               |
| scaffold_42:66264           | Splice region variant                      | Manganese superoxide dismutase         | CC1G_03559               |
| scaffold_124:43286          | Splice region variant                      | Glyoxalase I                           | CC1G_02307               |
| scaffold_239:36981          | Splice region variant                      | Hypothetical protein                   | CC1G_12295               |
| scaffold_78:81092           | Stop gained                                | Trp-Asp repeats containing protein     | CC1G_03748               |



Table 2. Interaction between RNA editing sites and milRNA. \* for RT-qPCR validated milRNA.

| RNA editing<br>position | milRNA binding                      |                |                                                     |
|-------------------------|-------------------------------------|----------------|-----------------------------------------------------|
|                         | Lost                                | Gain           | Remains                                             |
| scaffold_105:15293      |                                     | cci-milR-38-5p |                                                     |
| scaffold_118:64567      | cci-milR-33-3p*                     |                | cci-milR-27                                         |
| scaffold_118:64602      | cci-milR-21a-5p,<br>cci-milR-21b-5p |                |                                                     |
| scaffold_13:185033      | cci-milR-28                         | cci-milR-33-5p |                                                     |
| scaffold_23:18866       |                                     |                | cci-milR-18,<br>cci-milR-33-3p*                     |
| scaffold_23:198001      |                                     |                | cci-milR-25,<br>cci-milR-32-3p*,<br>cci-milR-33-3p* |
| scaffold_3:265899       |                                     |                | cci-milR-32-3p*                                     |
| scaffold_302:10673      | cci-milR-33-5p,<br>cci-milR-35      |                |                                                     |
| scaffold_320:19744      |                                     |                | cci-milR-25                                         |
| scaffold_340:18068      | cci-milR-33-5p                      |                |                                                     |
| scaffold_343:9606       |                                     |                | cci-milR-17*                                        |
| scaffold_390:3277       |                                     |                | cci-milR-33-3p*,<br>cci-milR-33-5p                  |
| scaffold_412:12417      |                                     |                | cci-milR-30                                         |
| scaffold_71:107334      |                                     |                | cci-milR-19-3p                                      |
| scaffold_73:108325      | cci-milR-23                         |                |                                                     |
| scaffold_76:107237      | cci-milR-32-3p*,<br>cci-milR-33-3p* | cci-milR-32-5p |                                                     |
| scaffold_76:45473/6     |                                     | cci-milR-27    |                                                     |
| scaffold_77:35473       |                                     | cci-milR-22*   |                                                     |

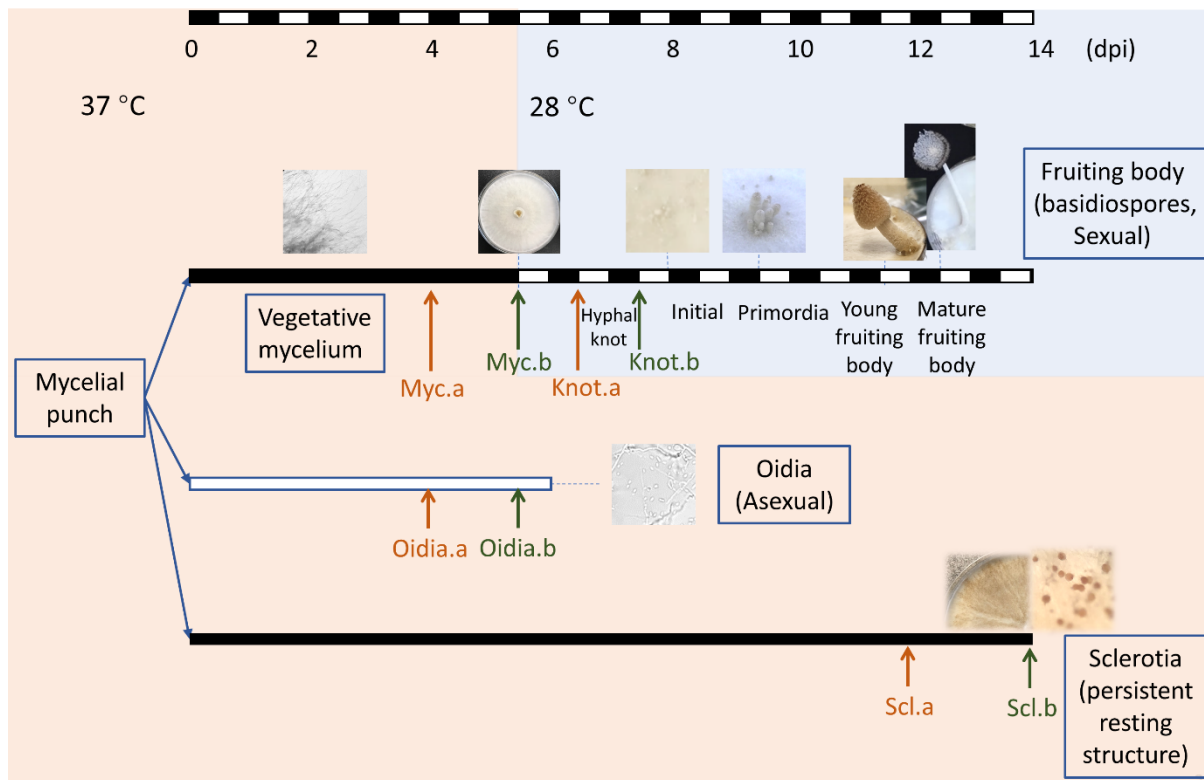

Fig 1. Developmental paths of *Coprinopsis cinerea* and experimental design. Mycelial punch was inoculated to each cellophane covered YMG plate and then incubated under different environment. Time scale bars indicate days post inoculation (dpi) and light exposure (white) or dark incubation (black) of each developmental process. Arrows indicate sample collection of time point a (before structure formation, developing colony, orange) and b (structure formed, developed colony, green).

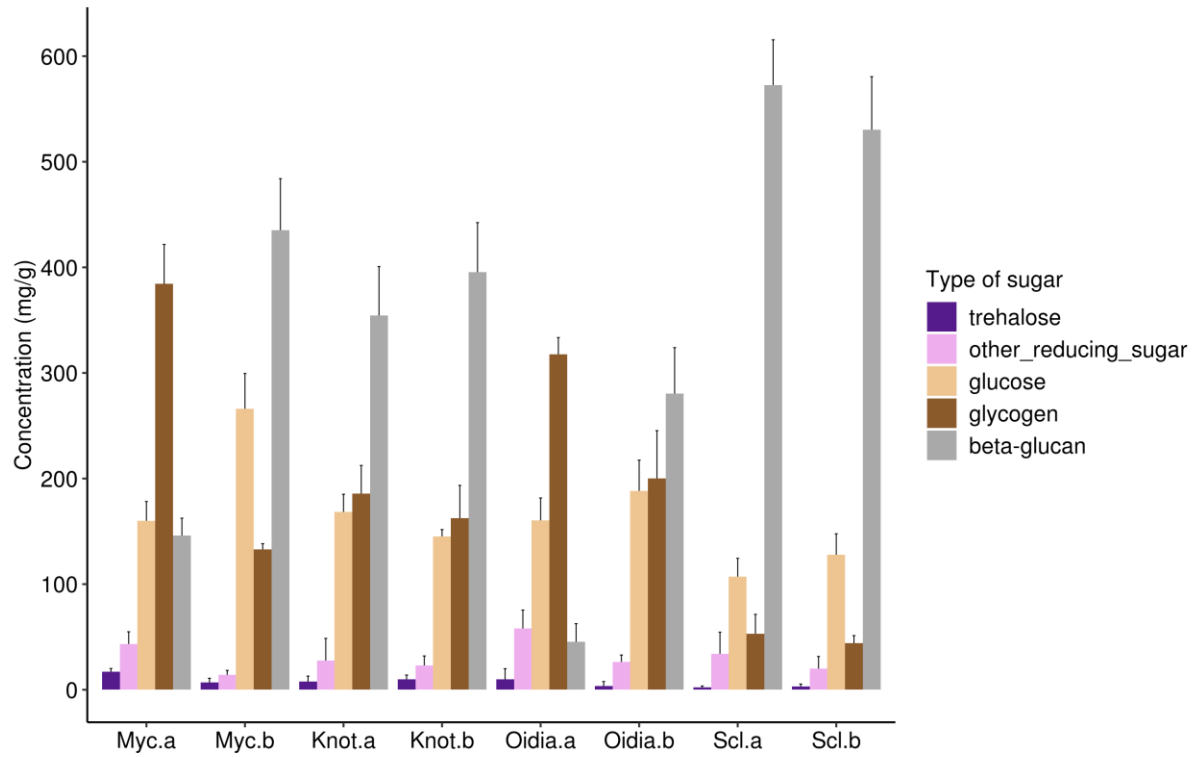

Fig 2. Carbohydrate content in different developmental paths. Error bar showing the standard deviation of 5 biological replicates. Statistic results present in Table S1.

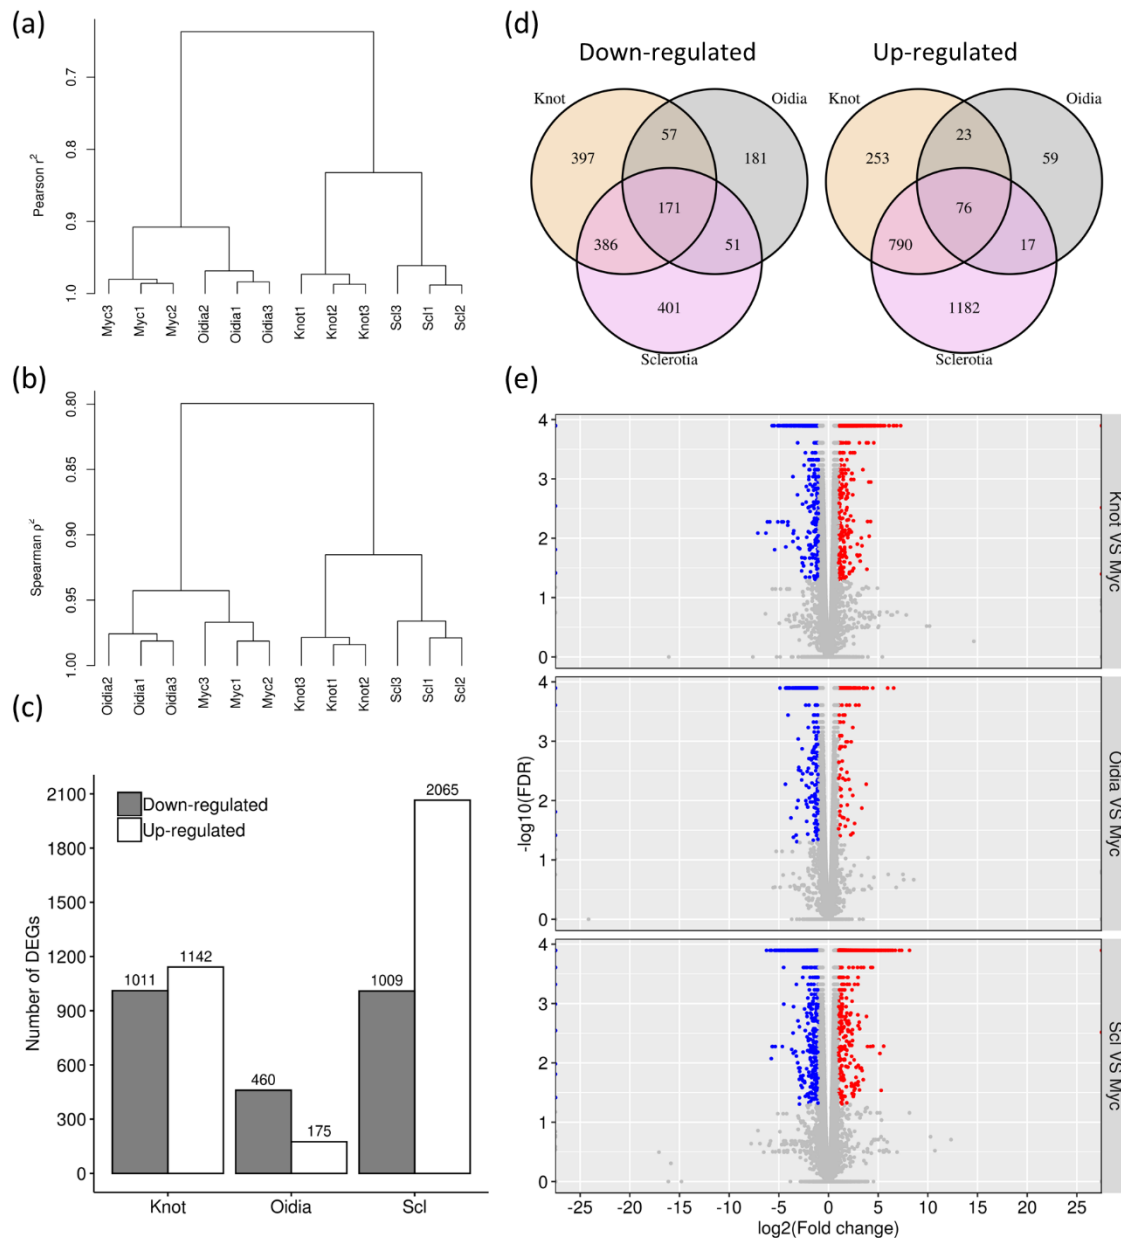

Fig 3. Transcriptome profiles of four developmental paths. (a-b) Hierarchical clustering of RNA samples using FPKM values with Pearson's correlation (a) and Spearman's correlation (b). (c) Number of DEGs between vegetative mycelium and other three developmental paths. (d) Venn diagram showing the DEGs shared by different developmental paths. (e) Volcano plots showing distributions of DEGs, taking gene expression levels in vegetative mycelium as reference, grey dots showing non-DEGs.

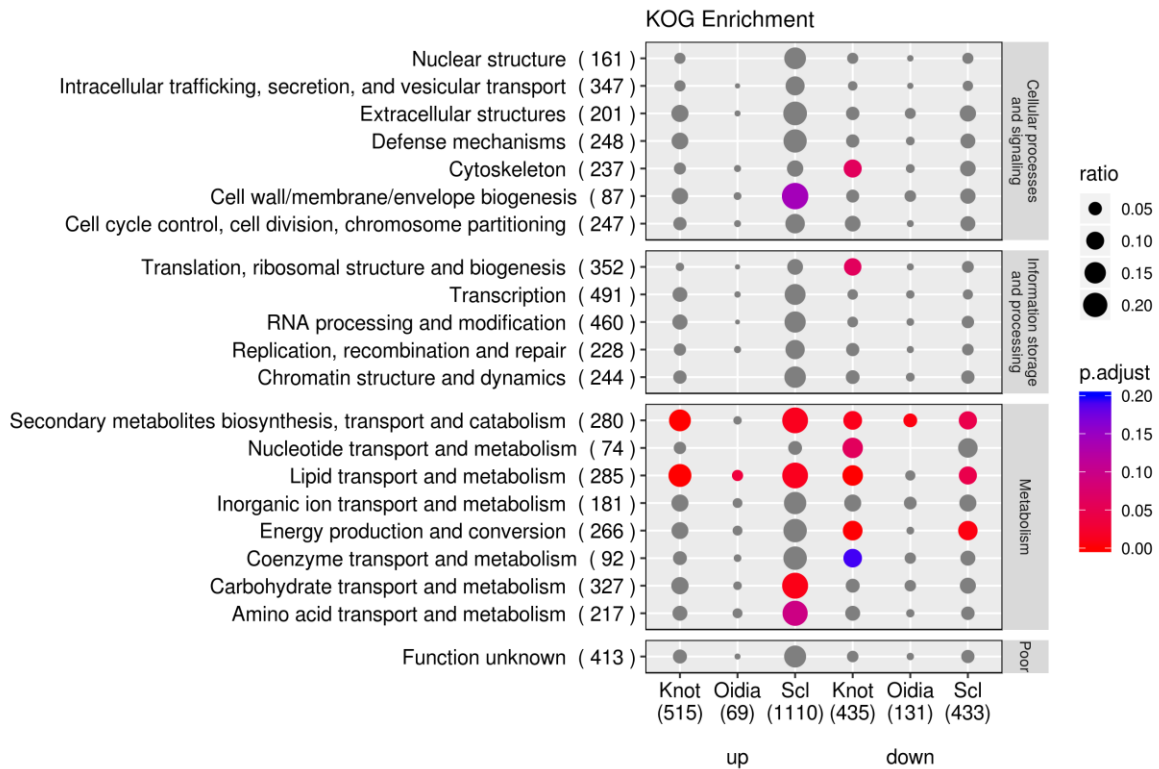

Fig 4. KOG enrichment analysis on DEGs on reproductive development. Number of annotated genes are listed below. Number beside KOG terms indicates number of genes being annotated to the node in the genome. Ratio is calculated by annotated genes of specific KOG term in each DEG group over annotated genes of specific KOG term in the genome background. Enrichment groups with Benjamini and Hochberg method (BH) adjusted p value  $\leq 0.20$  are shaded in red to blue color, others are in grey.

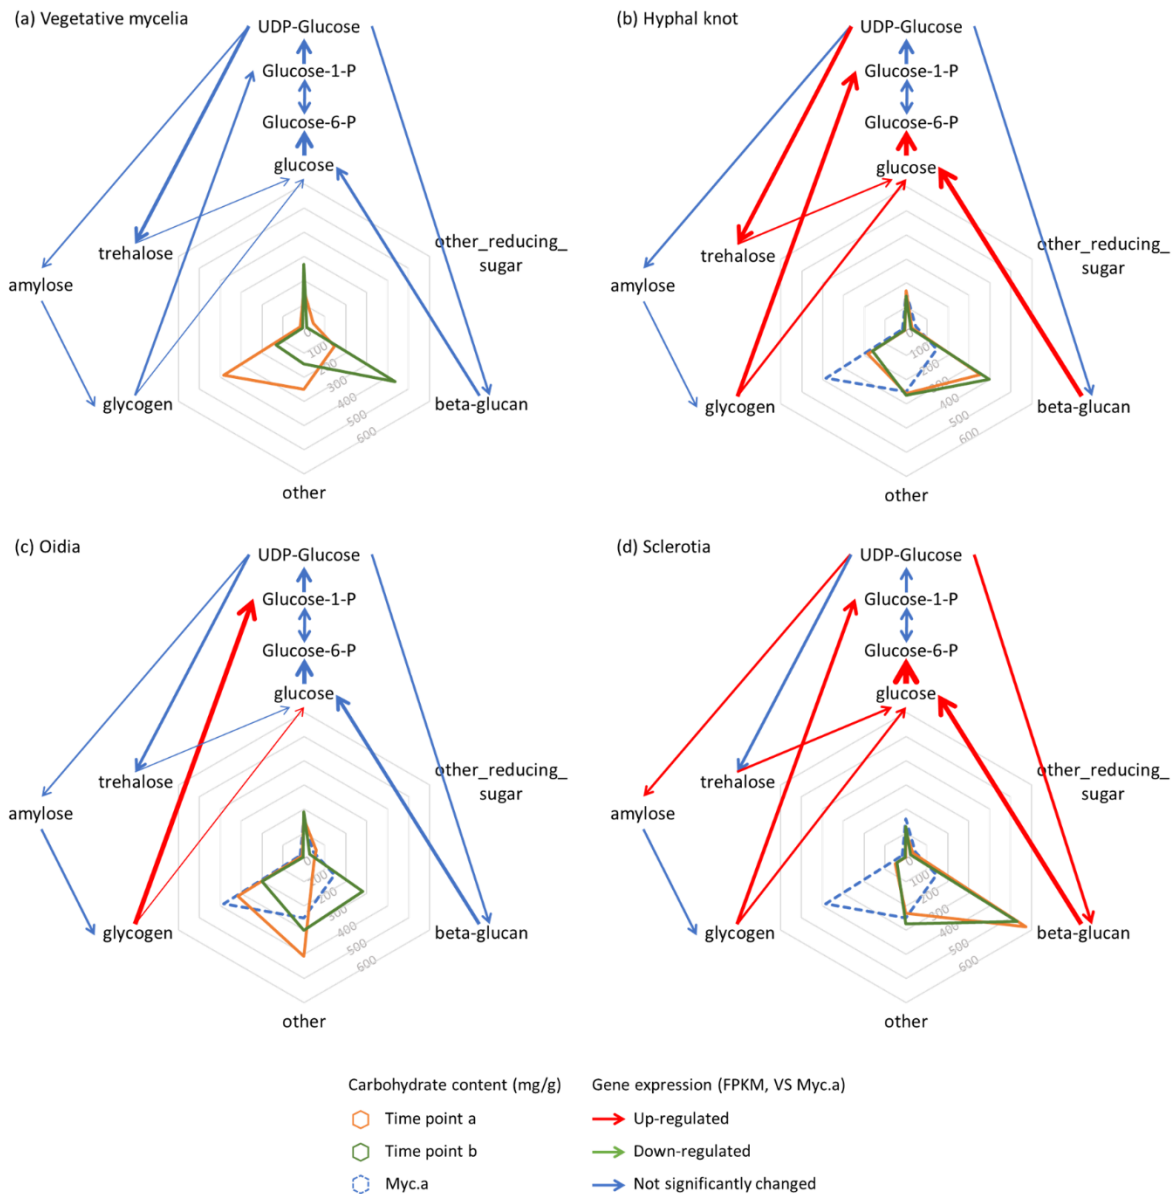

Fig 5. Gene expression level reflects the carbohydrate metabolic flux. Spider plots show content of different type of carbohydrate, arrows indicate the conversion from substrate to product. Thickness of the arrow indicates relative value of expression level of enzyme coding gene. Red arrows indicate up-regulation of expression level compare to vegetative mycelia, green arrows indicate down-regulation (none), and blue arrows indicate that the expression level is not significantly changed.

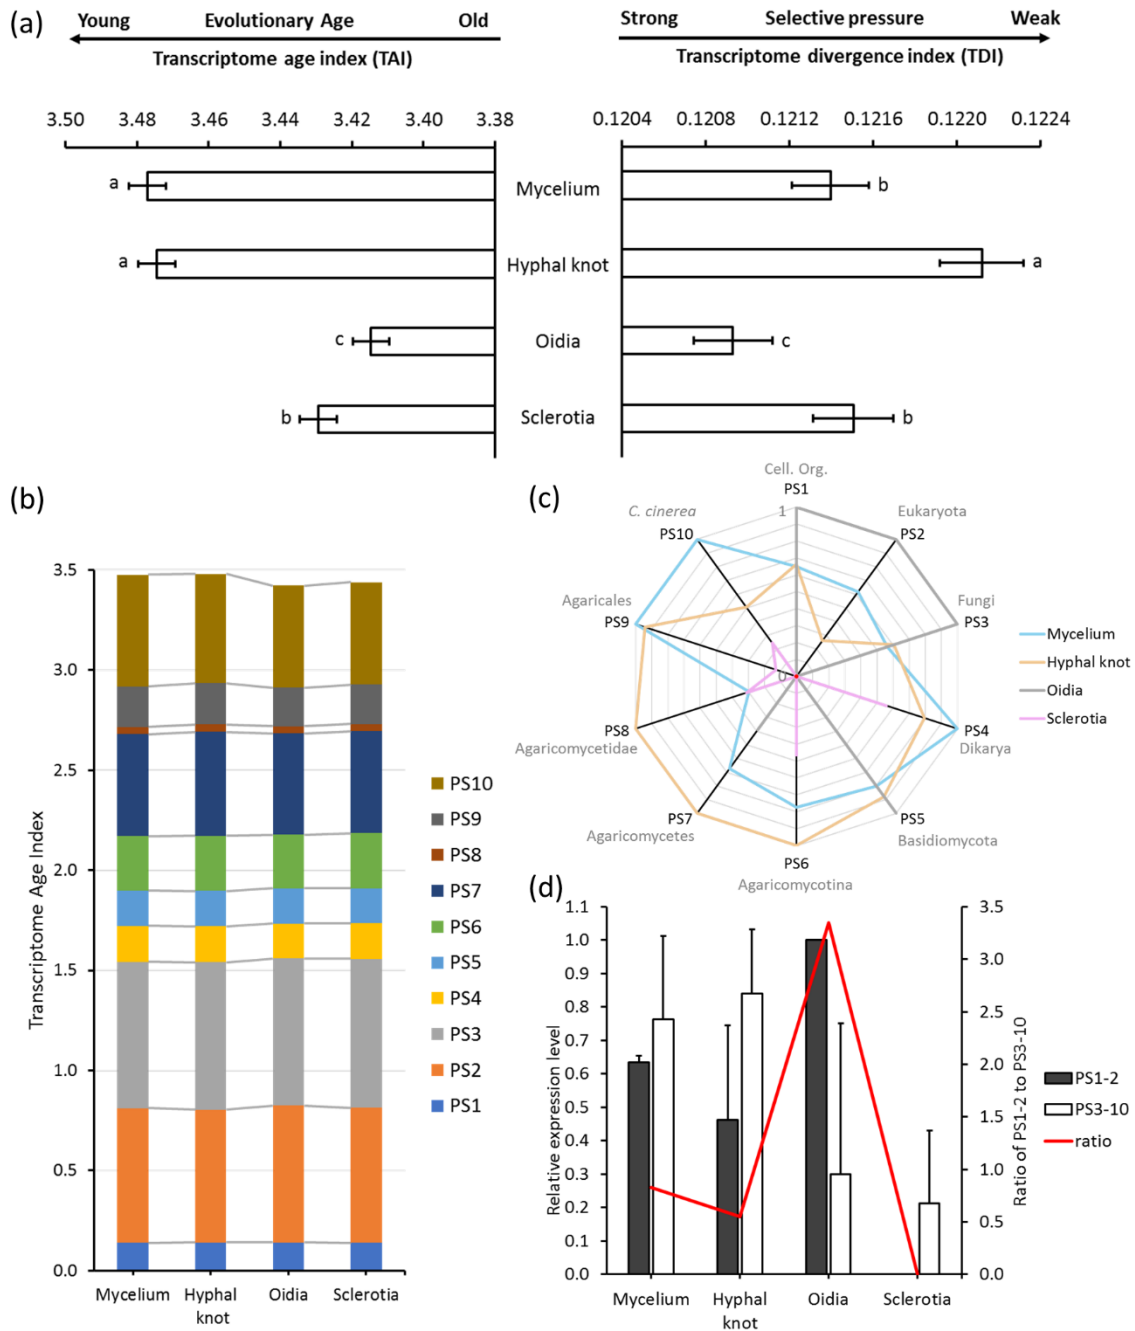

Fig 6. Evolutionary transcriptome profiles of developmental paths. (a) TAI and TDI values of different developmental paths. TAI quantifies the mean evolutionary age of a transcriptome. The lower the TAI, the evolutionarily older the transcriptome; TDI quantifies the mean selection force acting on a transcriptome. The lower the TDI, the stronger the force of purifying selection, giving its value less than 1. Error bars showing 95 % confidence interval estimated by bootstrap sampling for 1000 times. Lowercase letters showing TAI/TDI values

that are significantly different among developmental paths in multiple comparisons ( $p < 0.05$ ). (b) Contribution of each PS to the TAI:  $PS\ 3 > PS\ 2 > PS\ 10 > PS\ 7 > PS\ 6 > PS\ 9 > PS\ 4 \approx PS\ 5 > PS\ 1 > PS\ 8$ . (c) Relative expression level of genes from each PS across developmental paths. (d) Mean relative expression level of old genes (PS 1-2) and young genes (PS 3-10) over developmental paths. Relative expression level (RE) of PS 1 and PS 2 in oidia are the same and equal to 1, RE of PS 1 and PS 2 in sclerotia are the same and equal to 0.



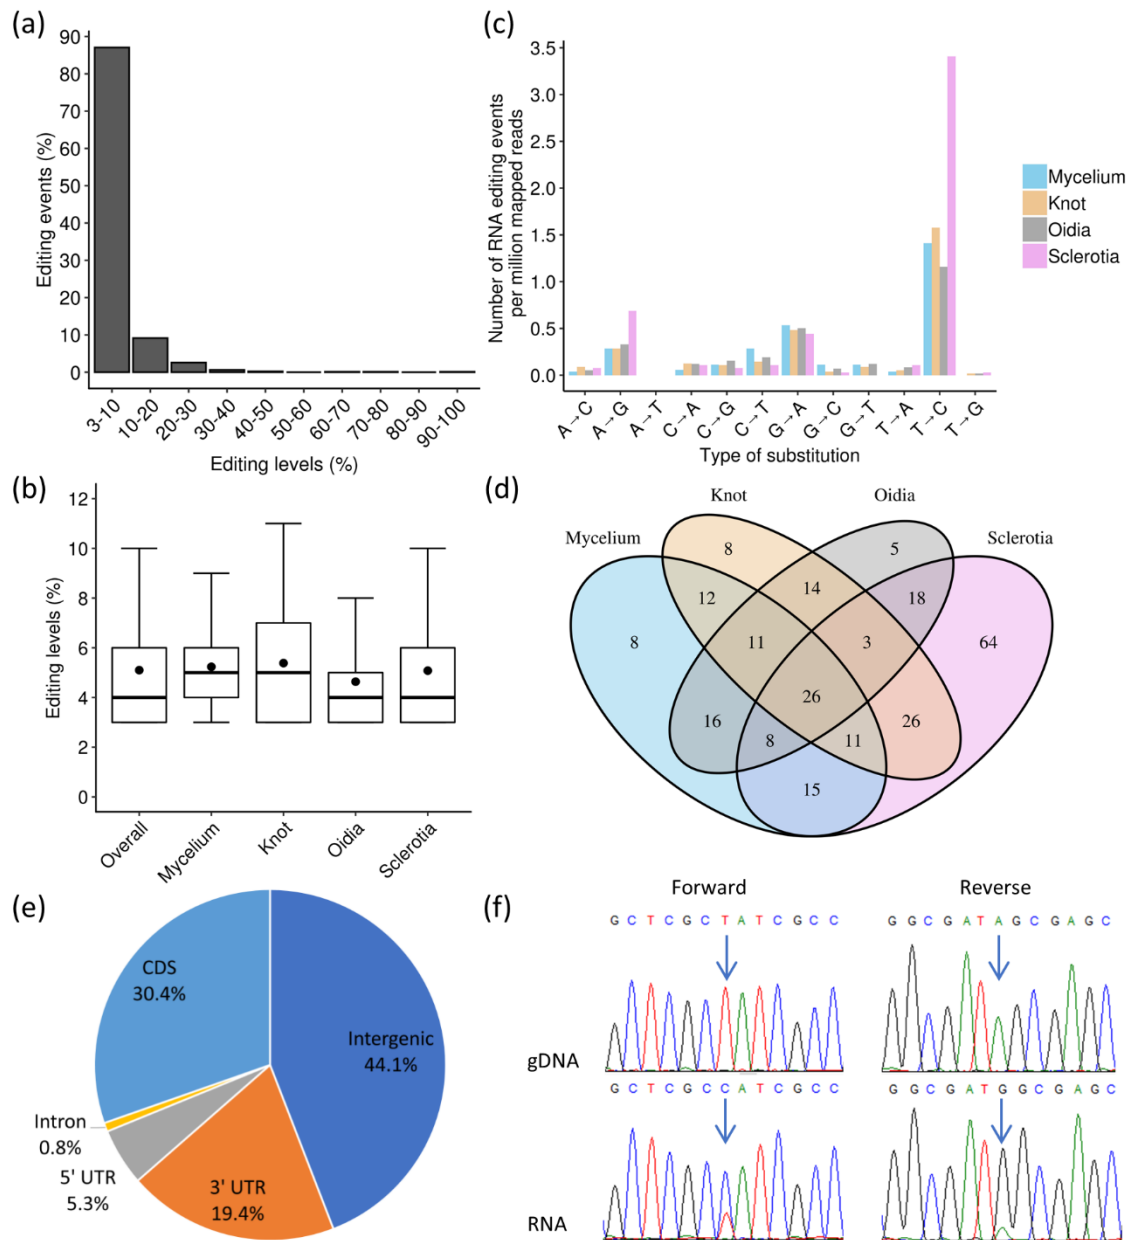

Fig 7. Properties of RNA editing sites and RNA editing events. (a) Histogram showing the frequency of 819 RNA editing events. (b) The number of each type of RNA editing events per million mapped reads in different developmental stages. (c) Box plots showing RNA editing levels of RNA editing events in different developmental paths. (d) Venn diagram showing the number of RNA editing sites shared by different developmental paths. (e) The distribution of 245 RNA editing sites. (f) Sanger sequencing validates T-to-C RNA editing events on scaffold\_131:54938 (- strand), blue arrow indicates editing site.

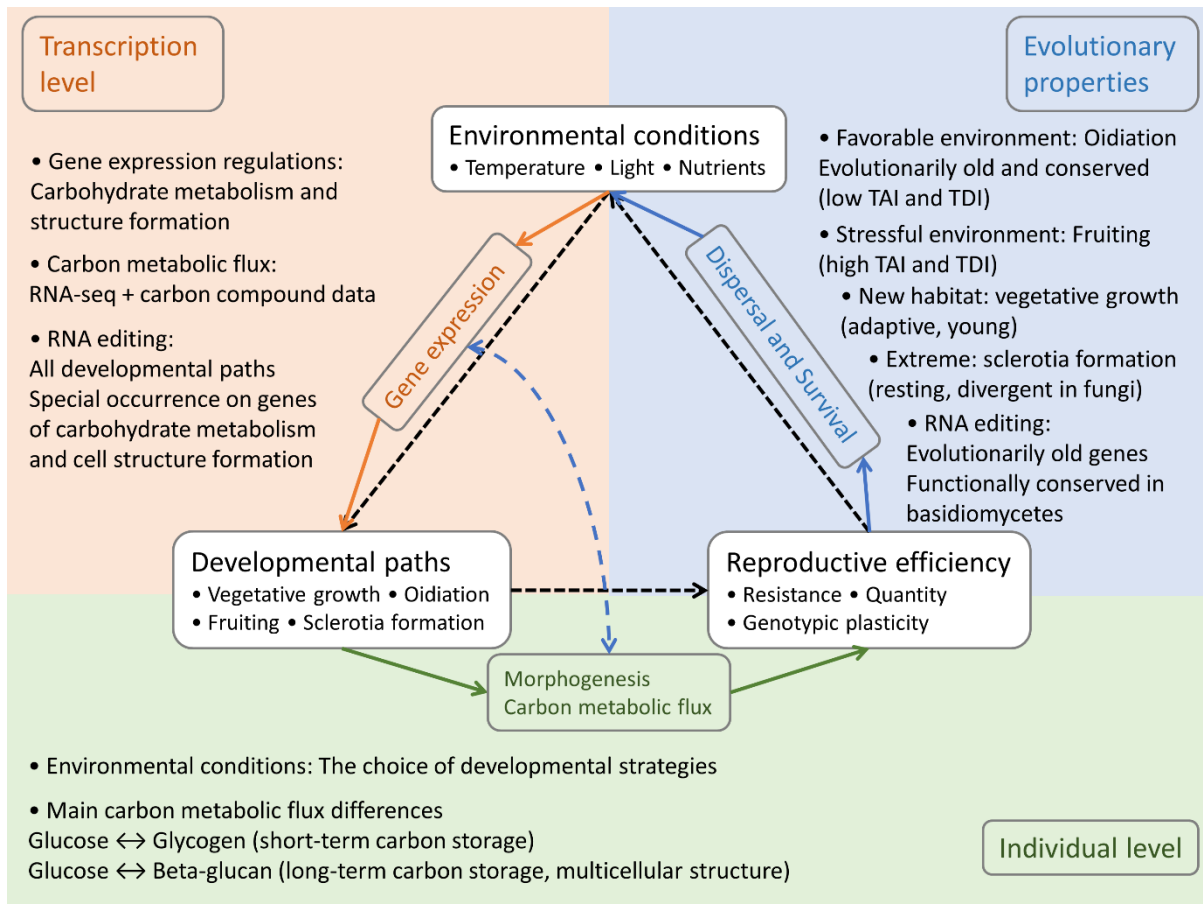

Fig 8. Properties of developmental paths differentiation in *C. cinerea*
